# Supplementary material
Source: ML conference proceedings conference paper supplement (https://openaccess.thecvf.com/content/CVPR2024/html/Li_Towards_Efficient_Replay_CVPR_2024_paper.html)
Supplement: Supplementary file 1 [file Li_Towards_Efficient_Replay_CVPR_2024_supplemental.pdf]

# Towards Efficient Replay in Federated Incremental Learning

## Supplementary Material

### A. Dataset

**Class-Incremental Task Dataset:** New classes are incrementally introduced over time. The dataset starts with a subset of classes, and new classes are added in subsequent stages, allowing models to learn and adapt to an increasing number of classes.

- **CIFAR10:** A dataset with 10 object classes, including various common objects, animals, and vehicles. It consists of 50,000 training images and 10,000 test images.
- **CIFAR100:** Similar to CIFAR10, but with 100 fine-grained object classes. It has 50,000 training images and 10,000 test images.
- **Tiny-ImageNet:** A subset of the ImageNet dataset with 200 object classes. It contains 100,000 training images, 10,000 validation images, and 10,000 test images.

**Domain-Incremental Task Dataset:** New domains are introduced gradually. The dataset initially contains samples from a specific domain, and new domains are introduced at later stages, enabling models to adapt and generalize to new unseen domains.

- **Digit10:** Digit-10 dataset contains 10 digit categories in four domains: **MNIST**[19], **EMNIST**[3], **USPS**[13], **SVHN**[34]. Each dataset is a digit image classification dataset of 10 classes in a specific domain, such as handwriting style.
  - **MNIST:** A dataset of handwritten digits with a training set of 60,000 examples and a test set of 10,000 examples.
  - **EMNIST:** An extended version of MNIST that includes handwritten characters (letters and digits) with a training set of 240,000 examples and a test set of 40,000 examples.
  - **USPS:** The United States Postal Service dataset consists of handwritten digits with a training set of 7,291 examples and a test set of 2,007 examples.
  - **SVHN:** The Street View House Numbers dataset contains images of house numbers captured from Google Street View, with a training set of 73,257 examples and a test set of 26,032 examples.
- **Office31:** A dataset with images from three different domains: Amazon, Webcam, and DSLR. It consists of 31 object categories, with each domain having around 4,100 images.
- **DomainNet:** A large-scale dataset with images from six different domains: Clipart, Painting, Real, Sketch, Quickdraw, and Infograph. It contains over 0.6 million images across 345 categories.

### B. Baseline

#### • Representative FL models:

- **FedAvg:** : It is a representative federated learning model, which aggregates client parameters in each communication. It is a simply yet effective model for federated learning.
- **FedProx:** It is also a representative federated learning model, which is better at tackling heterogeneity in federated networks than FedAvg

#### • Custom methods:

- **Fixed:** we train the model only from the first task and evaluate it for all the coming sequence of tasks.
- **DANN+FL:** Here we adopt the robust adversarial-based method DANN[9]. This baseline mainly follows the domain adaptation paradigm which is different from the incremental learning setting and are often prone to issues like catastrophic forgetting.
- **Shared:** Inspired by the multi-task learning scenario[40], we adopt all front layers before the last fully connected layer as shared layers, and use relevant different fully-connected layers to get outputs for different tasks.

#### • Models for federated class-incremental learning:

- **FCIL:** This approach addresses the federated class-incremental learning and trains a global model by computing additional class-imbalance losses. A proxy server is introduced to reconstruct samples to help clients select the best old models for loss computation.
- **FedCIL:** This approach employs the ACGAN backbone to generate synthetic samples to consolidate the global model and align sample features in the output layer. Authors conduct experiments in the FCIL scenario, and here we adopt it to our FDIL setting.

### C. Configurations

For local training, the batch size is 64, learning rate for our models is 0.01/0.001 for {Office31, CIFAR10, CIFAR100}/{Digit10, DomainNet, Tiny-ImageNet}. For the update of the personalized informative model, the epoch is set to 40 for each client. For the multi-task learning structure in our approach, we treat all previous layers before the last fully-connected layer as share layers, and we use two different fully-connected layers to get outputs as the auxiliary classifier result and target classification result. We build the Virtual Machine(VM) to simulate the experiment environment and set up different processes to simulate different clients. The VM is configured with 8 RTX4090 and 6 2.3GHz Intel Xeon CPUs.

## D. Detailed Re-Fed Framework with FedAvg

---

### Algorithm 2: Re-Fed for FIL with FedAvg Algorithm

---

**Input:**  $T$ : communication round;  $K$ : number of clients;  $\eta$ : learning rate;  $\{\mathcal{T}^t\}_{t=1}^n$ : distributed dataset with  $n$  tasks;  $w$ : parameter of the model;  $v_k$ : personalized informative model in client  $k$ ;  $\lambda$ : factor of information proportion.

- 1 Initialize the parameter  $w$ ;
- 2 **for**  $c = 1$  **to**  $T$  **do** // When the  $t$ -th new task arrives
- 3     Server randomly selects a subset of devices  $S_t$  and send  $w^{t-1}$  to them;
- 4     **for each selected client**  $k \in S_t$  **in parallel do**
- 5         Receive the distributed global model  $w^{t-1}$  and initialize the personalized informative model  $v_k^{t-1}$ ;
- 6         Update  $v_k^{t-1}$  in  $s$  local iterations with previous local samples  $\mathcal{T}_{k,local}^{t-1}$ :
- 7         
$$v_{k,s}^{t-1} = v_{k,s-1}^{t-1} - \eta \left( \sum_{i=1}^M \nabla l \left( f_{v_{k,s-1}^{t-1}}(\tilde{x}_{k,t-1}^{(i)}, \tilde{y}_{k,t-1}^{(i)}) + q(\lambda)(v_{k,s-1}^{t-1} - w^{t-1}) \right), q(\lambda) = \frac{1-\lambda}{2\lambda}, \lambda \in (0, 1) \right).$$
- 8         **for** *During the update of*  $v_k^{t-1}$  **do**
- 9             Calculate the importance score for the sample  $(\tilde{x}_{k,t-1}^{(i)}, \tilde{y}_{k,t-1}^{(i)})$  after total  $s$  iterations:
- 10             
$$I(\tilde{x}_{k,t-1}^{(i)}) = \sum_{p=1}^s \frac{G^p(\tilde{x}_{k,t-1}^{(i)})}{p}.$$
- 11             **end**
- 12             Cache previous samples with higher importance scores;
- 13             Train the local model with cached samples and the new task  $(\tilde{x}_{k,t}^{(i)}, \tilde{y}_{k,t}^{(i)})$  in  $s$  iterations:
- 14             
$$w_{k,s}^t = w_{k,s-1}^t - \eta \left( \sum_{i=1}^M \nabla l \left( f_{w_{k,s-1}^t}(\tilde{x}_{k,t}^{(i)}, \tilde{y}_{k,t}^{(i)}) \right) \right).$$
- 15             Send the model  $w_k^t$  back to the server.
- 16         **end**
- 17     The server aggregates the local models:  $w^t = \sum_{k \in S_t} \frac{1}{|S_t|} w_k^t.$
- 18 **end**

---

## E. Experimental Results

In this section, we further provide more details about the experiment results on the test accuracy and communication rounds. We record the test accuracy of the global model at training stage of each task and the communication rounds required to achieve the corresponding performance. Then, as we use a form of ‘‘Early-Emphasis’’ to accumulate the gradient norms and calculate the sample importance scores in Re-Fed, we compare and show results with two other methods of calculation of sample importance scores.

### E.1. Detailed Results of Test Accuracy.

Table 5, 6, 7, 8 and 9 show the results of test accuracy on each incremental task in the **Acc** (Accuracy) line, where ‘‘ $\Delta$ ’’ denotes the improvement of our method with other baselines. Here we measure average accuracy over all tasks on each client in the **Acc** line and highlight the best test accuracy in **bold**.

### E.2. Detailed Results of Communication Round.

Table 5, 6, 7, 8 and 9 show the detailed results of communication round on each incremental task in the **CoR** (Communication Round) line and highlight the results of fewest number of communication rounds in underline.

### E.3. Different Weighting Methods for Gradient Norms.

Table 10 shows the impact of using different methods to calculate the sample importance score with gradient norms in the update of personalized informative models. Here we adopt three methods: **Average Weighting**: we assign an equal weight to gradient norms from different iterations; **Early-Emphasis**: a higher weight to gradient norms in the early-training as

adopted by Re-Fed; and **Late-Emphasis**: the sorting of samples with the sample importance score obtained by the method of **Early-Emphasis** is reversed.

Table 5. Performance comparisons of various methods on CIFAR10 with 5 incremental tasks (2 new classes for each task).

| CIFAR10 ( $\alpha = 1.0$ ) |        |              |              |              |              |              |              |                    |
|----------------------------|--------|--------------|--------------|--------------|--------------|--------------|--------------|--------------------|
| Method                     | Target | 2            | 4            | 6            | 8            | 10           | Avg          | $\Delta(\uparrow)$ |
| FedAvg                     | Acc    | 92.65        | 76.67        | 42.90        | 40.46        | 26.73        | 55.88        | 2.57 $\uparrow$    |
|                            | CoR    | 142          | 123          | 125          | 98           | 119          | 122          | 10 $\uparrow$      |
| FedProx                    | Acc    | 92.39        | 74.18        | 39.84        | 37.55        | 25.87        | 53.97        | 4.48 $\uparrow$    |
|                            | CoR    | 153          | 137          | 141          | 123          | 132          | 137          | 25 $\uparrow$      |
| Fixed                      | Acc    | 92.65        | 62.48        | 36.54        | 24.20        | 19.21        | 47.02        | 11.43 $\uparrow$   |
|                            | CoR    | 142          | 0            | 0            | 0            | 0            | /            | /                  |
| DANN+FL                    | Acc    | 93.07        | 77.81        | 44.32        | 36.98        | 24.86        | 55.41        | 3.04 $\uparrow$    |
|                            | CoR    | 151          | 140          | 150          | 126          | 145          | 142          | 30 $\uparrow$      |
| Shared                     | Acc    | 92.65        | 76.19        | 42.15        | 38.24        | 23.91        | 54.63        | 3.82 $\uparrow$    |
|                            | CoR    | 142          | 117          | 116          | 83           | 118          | 115          | 3 $\uparrow$       |
| FCIL                       | Acc    | 92.65        | 78.07        | 43.66        | 40.28        | 25.04        | 55.94        | 2.51 $\uparrow$    |
|                            | CoR    | 142          | 125          | 108          | 92           | 121          | 118          | 6 $\uparrow$       |
| FedCIL                     | Acc    | <b>94.05</b> | <b>80.22</b> | 46.19        | 35.50        | 27.35        | 56.66        | 1.79 $\uparrow$    |
|                            | CoR    | 148          | 150          | 146          | 147          | 150          | 148          | 36 $\uparrow$      |
| Re-Fed                     | Acc    | 92.65        | 79.23        | <b>47.41</b> | <b>43.75</b> | <b>29.22</b> | <b>58.45</b> | /                  |
|                            | CoR    | <u>142</u>   | <u>109</u>   | 116          | 85           | <u>106</u>   | <u>112</u>   | /                  |

Table 6. Performance comparisons of various methods on CIFAR100 with 10 incremental tasks (10 new classes for each task).

| CIFAR100 ( $\alpha = 5.0$ ) |        |              |              |              |              |              |              |              |              |              |              |              |                    |
|-----------------------------|--------|--------------|--------------|--------------|--------------|--------------|--------------|--------------|--------------|--------------|--------------|--------------|--------------------|
| Method                      | Target | 10           | 20           | 30           | 40           | 50           | 60           | 70           | 80           | 90           | 100          | Avg          | $\Delta(\uparrow)$ |
| FedAvg                      | Acc    | 58.70        | 43.72        | 48.69        | 38.28        | 30.81        | 26.16        | 24.90        | 20.72        | 18.97        | 17.21        | 32.82        | 5.57 $\uparrow$    |
|                             | CoR    | 137          | 121          | <u>76</u>    | 135          | 102          | 143          | 90           | <u>86</u>    | 132          | 75           | 110          | 6 $\uparrow$       |
| FedProx                     | Acc    | 56.51        | 42.02        | 48.03        | 39.11        | 32.33        | 27.24        | 26.50        | 20.88        | 19.67        | 18.03        | 33.03        | 5.36 $\uparrow$    |
|                             | CoR    | 146          | 134          | 112          | 139          | 119          | 140          | 125          | 105          | 132          | 99           | 125          | 21 $\uparrow$      |
| Fixed                       | Acc    | 58.70        | 34.52        | 35.09        | 30.37        | 27.01        | 23.96        | 18.18        | 14.78        | 11.47        | 9.27         | 26.34        | 12.05 $\uparrow$   |
|                             | CoR    | 137          | 0            | 0            | 0            | 0            | 0            | 0            | 0            | 0            | 0            | /            | /                  |
| DANN+FL                     | Acc    | 58.82        | 44.12        | 46.84        | 39.66        | 31.54        | 27.93        | 24.21        | 24.03        | 21.32        | 19.73        | 33.82        | 4.57 $\uparrow$    |
|                             | CoR    | 145          | 129          | 123          | 138          | 124          | 134          | 112          | 109          | 129          | 121          | 126          | 22 $\uparrow$      |
| Shared                      | Acc    | 58.70        | 42.53        | 48.49        | 39.10        | 31.88        | 27.39        | 25.85        | 25.74        | 24.35        | 18.30        | 34.23        | 4.16 $\uparrow$    |
|                             | CoR    | 137          | 117          | 82           | 137          | 113          | 137          | 103          | 97           | 135          | 89           | 115          | 11 $\uparrow$      |
| FCIL                        | Acc    | 58.70        | 45.65        | 51.87        | 42.37        | 37.32        | 32.01        | 29.00        | 28.47        | 24.99        | 23.02        | 37.33        | 1.06 $\uparrow$    |
|                             | CoR    | 137          | 123          | 77           | 134          | 105          | 140          | 96           | 88           | 130          | <u>73</u>    | 110          | 6 $\uparrow$       |
| FedCIL                      | Acc    | <b>61.20</b> | <b>47.05</b> | 49.66        | 38.14        | 32.69        | 24.11        | 23.90        | 23.99        | 19.89        | 17.98        | 33.86        | 4.53 $\uparrow$    |
|                             | CoR    | 146          | 138          | 123          | 131          | 125          | 143          | 122          | 129          | 130          | 126          | 131          | 27 $\uparrow$      |
| Re-Fed                      | Acc    | 58.70        | 43.66        | <b>53.53</b> | <b>40.17</b> | <b>38.71</b> | <b>35.96</b> | <b>31.25</b> | <b>28.77</b> | <b>27.53</b> | <b>25.61</b> | <b>38.39</b> | /                  |
|                             | CoR    | <u>137</u>   | <u>104</u>   | 80           | <u>105</u>   | <u>93</u>    | <u>121</u>   | <u>85</u>    | 105          | <u>120</u>   | 87           | <u>104</u>   | /                  |

Table 7. Performance comparisons of various methods on Tiny-ImageNet with 10 incremental tasks (20 new classes for each task).

| Tiny-ImageNet ( $\alpha = 10.0$ ) |        |              |              |              |              |              |              |              |              |              |              |              |                    |
|-----------------------------------|--------|--------------|--------------|--------------|--------------|--------------|--------------|--------------|--------------|--------------|--------------|--------------|--------------------|
| Method                            | Target | 20           | 40           | 60           | 80           | 100          | 120          | 140          | 160          | 180          | 200          | Avg          | $\Delta(\uparrow)$ |
| FedAvg                            | Acc    | 85.80        | 68.58        | 57.22        | 43.75        | 40.52        | 41.13        | 34.10        | 29.59        | 28.40        | 27.58        | 45.67        | 5 $\uparrow$       |
|                                   | CoR    | 132          | 143          | 139          | 125          | 107          | <u>97</u>    | 128          | 121          | 109          | 98           | 120          | 7 $\uparrow$       |
| FedProx                           | Acc    | 82.02        | 66.15        | 54.32        | 40.57        | 38.80        | 38.99        | 30.59        | 24.12        | 22.76        | 21.82        | 42.01        | 8.66 $\uparrow$    |
|                                   | CoR    | 127          | 140          | 142          | 134          | 120          | 113          | 114          | 121          | <u>110</u>   | 108          | 123          | 10 $\uparrow$      |
| Fixed                             | Acc    | 85.80        | 51.07        | 30.94        | 28.11        | 25.30        | 24.26        | 19.48        | 17.18        | 14.66        | 12.34        | 30.91        | 19.76 $\uparrow$   |
|                                   | CoR    | 132          | 0            | 0            | 0            | 0            | 0            | 0            | 0            | 0            | 0            | /            | /                  |
| DANN+FL                           | Acc    | 85.24        | 68.16        | 55.32        | 41.11        | 36.45        | 35.38        | 28.83        | 24.54        | 21.09        | 20.77        | 41.69        | 8.98 $\uparrow$    |
|                                   | CoR    | 138          | 140          | 141          | 131          | 124          | 126          | 137          | 128          | 121          | 123          | 131          | 18 $\uparrow$      |
| Shared                            | Acc    | 85.80        | 67.21        | 56.49        | 42.05        | 40.17        | 37.59        | 28.61        | 25.90        | 23.89        | 22.19        | 42.99        | 7.68 $\uparrow$    |
|                                   | CoR    | 132          | 135          | 145          | 125          | 119          | 127          | 129          | 116          | 130          | 125          | 128          | 15 $\uparrow$      |
| FCIL                              | Acc    | 85.80        | 71.94        | 61.02        | 50.73        | 44.25        | <b>42.40</b> | 36.96        | 34.51        | 31.36        | 29.58        | 48.86        | 1.81 $\uparrow$    |
|                                   | CoR    | 132          | 130          | 127          | <u>112</u>   | 106          | 109          | 124          | 122          | 121          | 108          | 119          | 6 $\uparrow$       |
| FedCIL                            | Acc    | <b>86.43</b> | 69.39        | 58.11        | 45.74        | 41.02        | 38.93        | 31.29        | 27.65        | 25.17        | 24.41        | 44.81        | 5.86 $\uparrow$    |
|                                   | CoR    | 146          | 144          | 137          | 121          | 117          | 126          | 132          | 140          | 124          | 129          | 132          | 19 $\uparrow$      |
| Re-Fed                            | Acc    | 85.80        | <b>72.06</b> | <b>65.29</b> | <b>52.39</b> | <b>45.93</b> | 42.15        | <b>38.88</b> | <b>36.95</b> | <b>35.19</b> | <b>32.07</b> | <b>50.67</b> | /                  |
|                                   | CoR    | <u>132</u>   | <u>120</u>   | <u>126</u>   | 121          | <u>91</u>    | 103          | <u>110</u>   | <u>114</u>   | 112          | <u>92</u>    | <u>113</u>   | /                  |

Table 8. Performance comparisons of various methods on Digit10 with 4 domains and Office-31 with 3 domains.

|         |        | Digit10 ( $\alpha = 0.1$ ) |              |              |              |              |                    | Office-31 ( $\alpha = 1.0$ ) |              |              |              |                    |
|---------|--------|----------------------------|--------------|--------------|--------------|--------------|--------------------|------------------------------|--------------|--------------|--------------|--------------------|
| Method  | Target | MNIST                      | EMNIST       | USPS         | SVHN         | Avg          | $\Delta(\uparrow)$ | Amazon                       | Dlsr         | Webcam       | Avg          | $\Delta(\uparrow)$ |
| FedAvg  | Acc    | 92.82                      | 88.62        | 84.02        | 77.59        | 85.76        | 3.99 $\uparrow$    | 58.08                        | 31.62        | 39.25        | 42.98        | 8.76 $\uparrow$    |
|         | CoR    | 112                        | 82           | 96           | 122          | 103          | 22 $\uparrow$      | 144                          | 136          | 135          | 138          | 9 $\uparrow$       |
| FedProx | Acc    | 93.07                      | 87.43        | 85.67        | 79.09        | 86.32        | 3.43 $\uparrow$    | 58.69                        | 34.25        | 43.01        | 45.32        | 6.42 $\uparrow$    |
|         | CoR    | 114                        | 93           | 89           | 118          | 103          | 22 $\uparrow$      | 145                          | 146          | 139          | 143          | 14 $\uparrow$      |
| Fixed   | Acc    | 92.82                      | 85.35        | 82.11        | 71.26        | 82.48        | 7.27 $\uparrow$    | 58.08                        | 24.56        | 37.44        | 40.03        | 11.71 $\uparrow$   |
|         | CoR    | 112                        | 0            | 0            | 0            | /            | /                  | 144                          | 0            | 0            | /            | /                  |
| DANN+FL | Acc    | <b>96.07</b>               | 87.30        | 82.81        | 76.44        | 85.66        | 4.09 $\uparrow$    | <b>59.95</b>                 | 42.21        | 45.21        | 49.12        | 2.62 $\uparrow$    |
|         | CoR    | 132                        | 107          | 116          | 129          | 120          | 39 $\uparrow$      | 149                          | 144          | 141          | 145          | 16 $\uparrow$      |
| Shared  | Acc    | 92.82                      | 82.10        | 80.36        | 74.77        | 82.51        | 7.24 $\uparrow$    | 58.08                        | 35.33        | 37.55        | 43.65        | 8.09 $\uparrow$    |
|         | CoR    | 112                        | 76           | 84           | 103          | 93           | 12 $\uparrow$      | 144                          | <u>122</u>   | 124          | 130          | 1 $\uparrow$       |
| FCIL    | Acc    | 92.82                      | 88.62        | 84.02        | 77.59        | 85.76        | 3.99 $\uparrow$    | 58.08                        | 31.62        | 39.25        | 42.98        | 8.76 $\uparrow$    |
|         | CoR    | 112                        | 82           | 96           | 122          | 103          | 22 $\uparrow$      | 144                          | 136          | 135          | 138          | 9 $\uparrow$       |
| FedCIL  | Acc    | 94.61                      | 90.24        | 87.55        | 83.85        | 89.06        | 0.69 $\uparrow$    | 59.37                        | 45.91        | 46.26        | 50.51        | 1.23 $\uparrow$    |
|         | CoR    | 118                        | 86           | 92           | 125          | 105          | 24 $\uparrow$      | 146                          | 139          | 148          | 144          | 15 $\uparrow$      |
| Re-Fed  | Acc    | 92.82                      | <b>91.64</b> | <b>88.57</b> | <b>85.96</b> | <b>89.75</b> | /                  | 58.08                        | <b>47.07</b> | <b>50.80</b> | <b>51.74</b> | /                  |
|         | CoR    | <u>112</u>                 | <u>68</u>    | <u>73</u>    | <u>71</u>    | <u>81</u>    | /                  | <u>144</u>                   | 125          | <u>118</u>   | <u>129</u>   | /                  |

Table 9. Performance comparisons of various methods on DomainNet with 6 domains.

| DomainNet ( $\alpha = 10$ ) |        |              |              |              |              |              |              |              |                    |
|-----------------------------|--------|--------------|--------------|--------------|--------------|--------------|--------------|--------------|--------------------|
| Method                      | Target | Clipart      | Infograph    | Painting     | Quickdraw    | Real         | Sketch       | Avg          | $\Delta(\uparrow)$ |
| FedAvg                      | Acc    | 52.07        | 36.22        | 45.09        | 46.59        | 49.36        | 51.73        | 46.84        | 3.39 $\uparrow$    |
|                             | CoR    | 141          | 128          | 97           | 108          | 136          | 115          | 121          | 11 $\uparrow$      |
| FedProx                     | Acc    | 50.31        | 33.64        | 41.77        | 45.04        | 47.44        | 49.12        | 44.55        | 5.68 $\uparrow$    |
|                             | CoR    | <u>136</u>   | 131          | 115          | 130          | 137          | 116          | 128          | 1 $\uparrow$       |
| Fixed                       | Acc    | 52.07        | 29.58        | 32.24        | 38.91        | 40.09        | 46.30        | 39.87        | 10.36 $\uparrow$   |
|                             | CoR    | 141          | 0            | 0            | 0            | 0            | 0            | /            | /                  |
| DANN+FL                     | Acc    | <b>55.66</b> | 36.44        | 42.02        | 38.84        | 45.89        | 50.01        | 44.81        | 5.42 $\uparrow$    |
|                             | CoR    | 142          | 126          | 109          | 112          | 137          | 121          | 125          | 15 $\uparrow$      |
| Shared                      | Acc    | 52.07        | 35.22        | 37.83        | 35.19        | 40.52        | 41.76        | 40.43        | 9.80 $\uparrow$    |
|                             | CoR    | 141          | 113          | 98           | 125          | 120          | 96           | 116          | 6 $\uparrow$       |
| FCIL                        | Acc    | 52.07        | 36.22        | 45.09        | 46.59        | 49.36        | 51.73        | 46.84        | 3.39 $\uparrow$    |
|                             | CoR    | 141          | 128          | 97           | <u>108</u>   | 136          | 115          | 121          | 11 $\uparrow$      |
| FedCIL                      | Acc    | 54.52        | 38.98        | 40.45        | 41.77        | 45.09        | 47.28        | 44.68        | 5.55 $\uparrow$    |
|                             | CoR    | 148          | 136          | 128          | 112          | 142          | 125          | 132          | 22 $\uparrow$      |
| Re-Fed                      | Acc    | 52.07        | <b>42.26</b> | <b>48.11</b> | <b>48.98</b> | <b>53.34</b> | <b>56.66</b> | <b>50.23</b> | /                  |
|                             | CoR    | 141          | <u>103</u>   | <u>97</u>    | 109          | <u>118</u>   | <u>91</u>    | <u>110</u>   | /                  |

Table 10. Performance comparisons of three weighting methods for gradient norms in two incremental scenarios.

| Dataset           | Class-Incremental Scenario |              |               | Domain-Incremental Scenario |              |              |
|-------------------|----------------------------|--------------|---------------|-----------------------------|--------------|--------------|
|                   | CIFAR10                    | CIFAR100     | Tiny-ImageNet | Digit10                     | Office31     | DomainNet    |
| Early-Emphasis    | <b>29.22</b>               | <b>25.61</b> | <b>32.07</b>  | <b>85.96</b>                | <b>50.80</b> | <b>56.66</b> |
| Average-Weighting | 28.73                      | 24.88        | 30.42         | 85.71                       | 48.95        | 56.04        |
| Late-Emphasis     | 26.57                      | 22.18        | 28.08         | 84.36                       | 47.29        | 53.90        |

## F. Analysis of the Federated Incremental-Learning Framework: Re-Fed

In this section, we prove the convergence of personalized informative models. To simplify the notation, here we conduct an analysis on a fixed task while the convergence does not depend on the IL setting. We first define following standard assumptions.

**Assumption 1** ( $L_2$  Distance.) The  $L_2$  distance between the optimal local models  $\hat{w}_k := \arg \min_{w_k} \{f(w_k)\}$  and the optimal global model  $\hat{w} := \arg \min_w \{\frac{1}{K} \sum_{k=1}^K \nabla f(w_k)\}$  is bounded by:

$$\|\hat{w}_k - \hat{w}\| \leq M, \forall k \in [K]. \quad (7)$$

**Assumption 2** (Gradient Variance.) The variance of stochastic gradients is finite and bounded at all clients by:

$$\mathbb{E}[\|\nabla f(\hat{w}_k)\|^2] \leq \sigma^2, \forall k \in [K]. \quad (8)$$

**Assumption 3** (Strong Convexity.) There exists  $\mu_k \in \mathbb{R}_+$  and a unique solution  $\hat{w}_k$ :

$$f(w_k) - f(\hat{w}_k) \geq \langle \nabla f(\hat{w}_k), w_k - \hat{w}_k \rangle + \frac{\mu_k}{2} \|w_k - \hat{w}_k\|^2. \quad (9)$$

### F.1. Proof of Theorem 3.1

**Definition 1** (Personalized Informative Model Formulation.) Denote the objective of personalized informative model  $v_k$  on client  $k$  while  $f(\cdot)$  is strongly convex as:

$$\begin{aligned} \hat{v}_k(\lambda) &:= \arg \min_{v_k} \left\{ f(v_k) + \frac{q(\lambda)}{2} \|v_k - \hat{w}\|^2 \right\} \\ q(\lambda) &:= \frac{1 - \lambda}{2\lambda}, \lambda \in (0, 1) \end{aligned} \quad (10)$$

where  $\hat{w}$  denotes the global model.

**Lemma 1** (Proportion of Global and Local Information.) For all  $\lambda \in (0, 1)$  and  $\lambda \rightarrow f(\lambda_k)$  is non-increasing:

$$\begin{aligned} \frac{\partial f(\hat{v}_k(\lambda))}{\partial \lambda} &\leq 0 \\ \frac{\partial \|\hat{v}_k(\lambda) - \hat{w}\|^2}{\partial \lambda} &\geq 0. \end{aligned} \quad (11)$$

Then, for  $k \in [K]$ , we can get:

$$\lim_{\lambda \rightarrow 0} \hat{v}_k(\lambda) := \hat{w}. \quad (12)$$

*Proof.* The proof here directly follows the proof in Theorem 3.1 [10]. As  $\lambda$  declines and  $q(\lambda)$  grows, the objective of Eq. 10 tends to optimize  $\|v_k - \hat{w}\|^2$  and increase the local empirical training loss  $f(v_k)$ , leading to the convergence on the global model. Hence we can modify the  $\lambda$  value to adjust the optimization direction of our model  $v_k$  thus the dominance of local and global model information.

**Theorem 3.1** (Personalized Informative Model.) Assuming the global model  $w^t$  converges to the optimal model  $\hat{w}$  with  $g(t)$  for any client  $k \in [K]$  at each communication round  $t$ :  $\mathbb{E}[\|w^t - \hat{w}\|^2] \leq g(t)$  and  $\lim_{t \rightarrow \infty} g(t) = 0$ , then there exists a constant  $C < \infty$  such that the personalized informative model  $v_k^t$  can converge to the optimal model  $\hat{v}_k$  with  $Cg(t)$ .

*Proof.* Here we first introduce the Lemma 2 here proved by [21] Lemma 13.

**Lemma 2** ([21] Lemma 13.) Under assumptions above,  $f(v_k)$  is  $\mu_k$ -strongly convex at each communication round  $t$ , we have:

$$\begin{aligned} \mathbb{E}[\|v_k^{t+1} - \hat{v}_k\|^2] &\leq (1 - \eta(\mu_k + q(\lambda))) \mathbb{E}[\|v_k^t - \hat{v}_k\|^2] + \eta^2 \left( \sigma + q(\lambda)(M + \frac{\sigma}{\mu_k}) \right)^2 + \eta^2 q(\lambda)^2 \mathbb{E}[\|w^t - \hat{w}\|^2] \\ &\quad + 2\eta^2 q(\lambda) \left( \sigma + q(\lambda)(M + \frac{\sigma}{\mu_k}) \right) \sqrt{\mathbb{E}[\|w^t - \hat{w}\|^2] + 2\eta q(\lambda)} \sqrt{\mathbb{E}[\|v_k^t - \hat{v}_k\|^2] \mathbb{E}[\|w^t - \hat{w}\|^2]}. \end{aligned} \quad (13)$$

Assume  $g(t+1) \leq g(t)$  and let positive number  $A$  be chosen such that  $A(g(t) - g(t+1)) \leq g^2(t)$ , and we arrive at  $(1 - \frac{g(t)}{A})g(t) \leq g(t+1)$ . Then, we prove the **Theorem 3.2** by induction. Assuming that  $\mathbb{E}[\|v_k^t - \hat{v}_k\|^2] \leq Cg(t)$  where

$C > 0$  and  $C \geq \frac{\mathbb{E}[\|v_k^0 - \hat{v}_k\|^2]}{g(0)}$ , the learning rate  $\eta = \frac{2g(t)}{A(\mu_k + q(\lambda))}$ , here we can continue with **Lemma 2**:

$$\begin{aligned} \mathbb{E}[\|v_k^{t+1} - \hat{v}_k\|^2] &\leq \left(1 - \frac{2g(t)}{A}\right)Cg(t) + \frac{4q(\lambda)\sqrt{C}g(t)}{A(\mu_k + q(\lambda))} \\ &\quad + \frac{4g(t)^2}{A^2(\mu_k + q(\lambda))^2} \left( (\sigma + q(\lambda)(M + \frac{\sigma}{\mu_k}))^2 + q(\lambda)^2g(t) + 2q(\lambda)\sqrt{g(t)}(\sigma + q(\lambda)(M + \frac{\sigma}{\mu_k})) \right). \end{aligned} \quad (14)$$

Therefore, if we let  $C = \max\left\{\frac{\mathbb{E}[\|v_k^0 - \hat{v}_k\|^2]}{g(0)}, 16, \frac{4\left((\sigma + q(\lambda)(M + \frac{\sigma}{\mu_k}))^2 + q(\lambda)^2g(t) + 2q(\lambda)\sqrt{g(t)}(\sigma + q(\lambda)(M + \frac{\sigma}{\mu_k}))\right)}{A(\mu_k + q(\lambda))^2\left(1 - \frac{1}{1 + \frac{\mu_k}{q(\lambda)}}\right)}\right\}$ , then we have:

$$\begin{aligned} &\frac{4q(\lambda)\sqrt{C}g(t)^2}{A(\mu_k + q(\lambda))} + \frac{4g(t)^2}{A^2(\mu_k + q(\lambda))^2} \left( (\sigma + q(\lambda)(M + \frac{\sigma}{\mu_k}))^2 + q(\lambda)^2g(t) + 2q(\lambda)\sqrt{g(t)}(\sigma + q(\lambda)(M + \frac{\sigma}{\mu_k})) \right) \leq \\ &\frac{q(\lambda)Cg(t)^2}{A(\mu_k + q(\lambda))} + \frac{4g(t)^2}{A^2(\mu_k + q(\lambda))^2} \left( (\sigma + q(\lambda)(M + \frac{\sigma}{\mu_k}))^2 + q(\lambda)^2g(t) + 2q(\lambda)\sqrt{g(t)}(\sigma + q(\lambda)(M + \frac{\sigma}{\mu_k})) \right) = \\ &\frac{Cg(t)^2}{A} \cdot \frac{1}{\left(1 + \frac{\mu_k}{q(\lambda)}\right)} + \frac{4g(t)^2}{A^2(\mu_k + q(\lambda))^2} \left( (\sigma + q(\lambda)(M + \frac{\sigma}{\mu_k}))^2 + q(\lambda)^2g(t) + 2q(\lambda)\sqrt{g(t)}(\sigma + q(\lambda)(M + \frac{\sigma}{\mu_k})) \right) \leq \\ &\frac{Cg(t)^2}{A} \cdot \frac{1}{\left(1 + \frac{\mu_k}{q(\lambda)}\right)} + \frac{g(t)^2}{A^2} \cdot CA \left(1 - \frac{1}{\left(1 + \frac{\mu_k}{q(\lambda)}\right)}\right) = \frac{Cg(t)^2}{A}. \end{aligned} \quad (15)$$

The first inequality uses the fact that  $16 \leq C$  and consequently  $4\sqrt{C} \leq C$ . The second inequality results from the definition of  $C$  as  $\frac{4\left((\sigma + q(\lambda)(M + \frac{\sigma}{\mu_k}))^2 + q(\lambda)^2g(t) + 2q(\lambda)\sqrt{g(t)}(\sigma + q(\lambda)(M + \frac{\sigma}{\mu_k}))\right)}{A(\mu_k + q(\lambda))^2} \leq C\left(1 - \frac{1}{\left(1 + \frac{\mu_k}{q(\lambda)}\right)}\right)$ . Hence, combining the results of **14** and **15** yields

$$\begin{aligned} \mathbb{E}[\|v_k^{t+1} - \hat{v}_k\|^2] &\leq \left(1 - \frac{2g(t)}{A}\right)Cg(t) + \frac{Cg(t)^2}{A} \\ &= \left(1 - \frac{g(t)}{A}\right)Cg(t) \\ &\leq Cg(t+1), \end{aligned} \quad (16)$$

and we have the desired result.
